# Supplementary material for: Functional analysis of Girardia tigrina transcriptome seeds pipeline for anthelmintic target discovery
Source: PubMed Central journal article supplement (PMC4304616; doi:10.1186/s13071-014-0622-3), 2015-01-20

**Color Key**

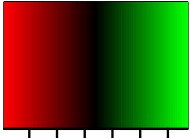

-2 0 2  
Value

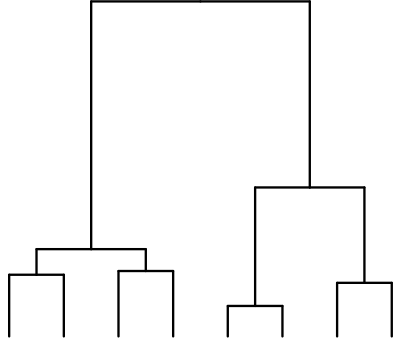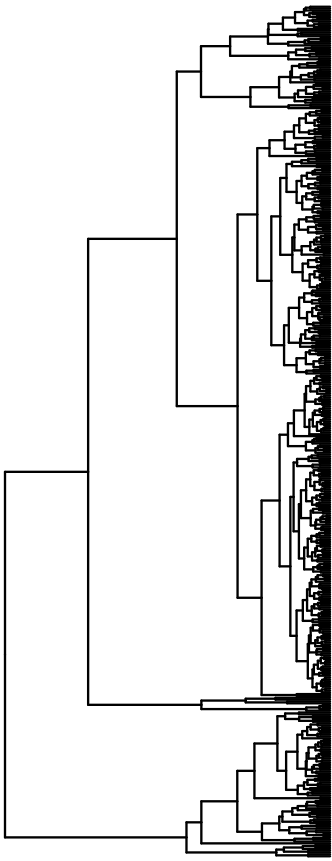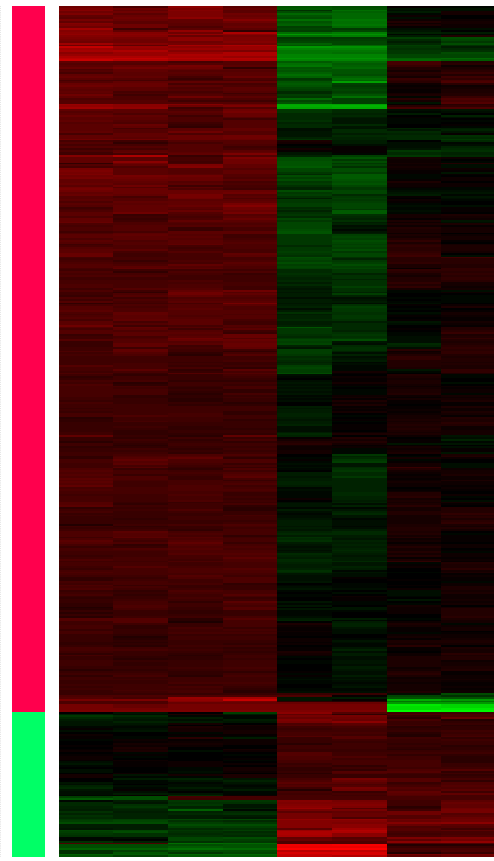

Cut1  
Cut2  
Ser1  
Ser2  
Con3  
Con4  
Con1  
Con2

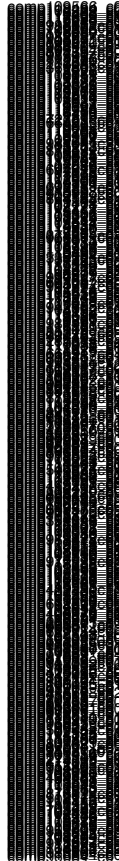

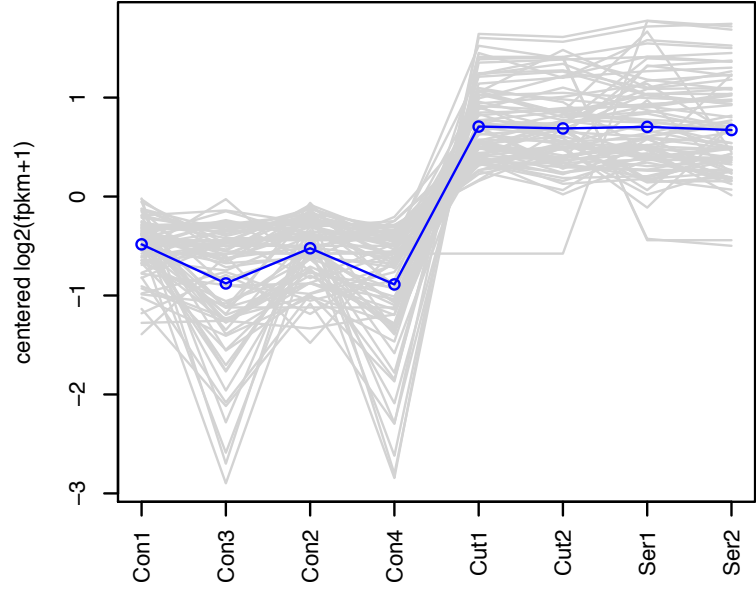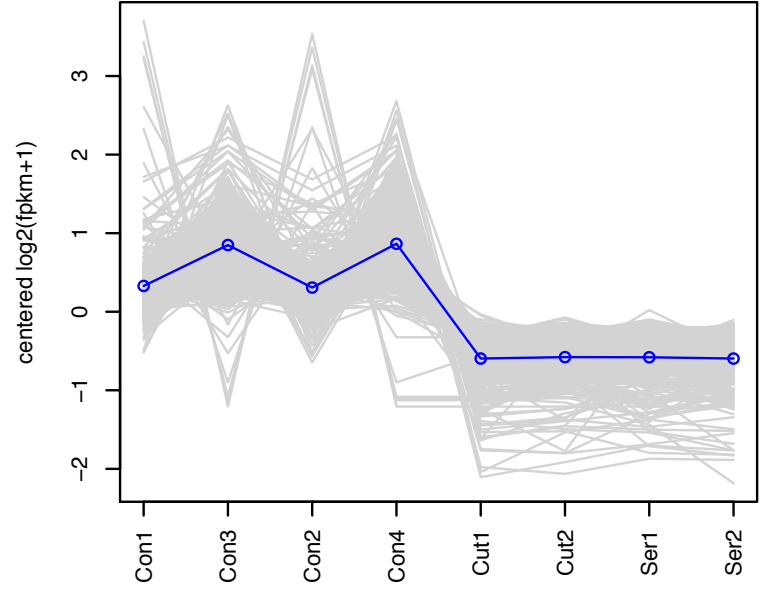

### Color Key

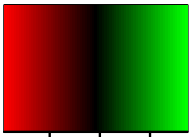

-1 0 1  
Value

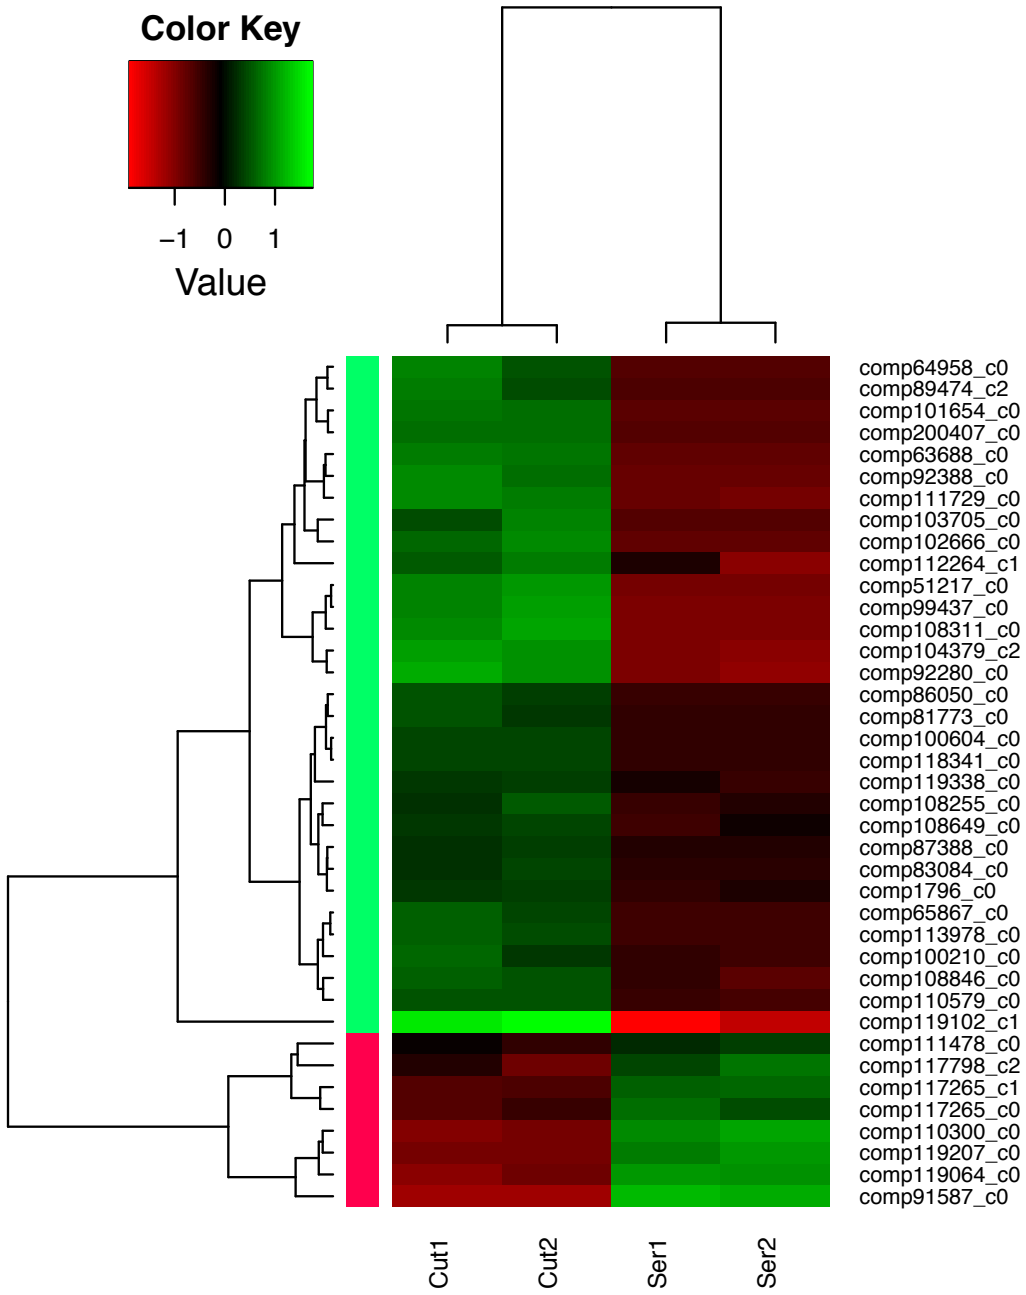

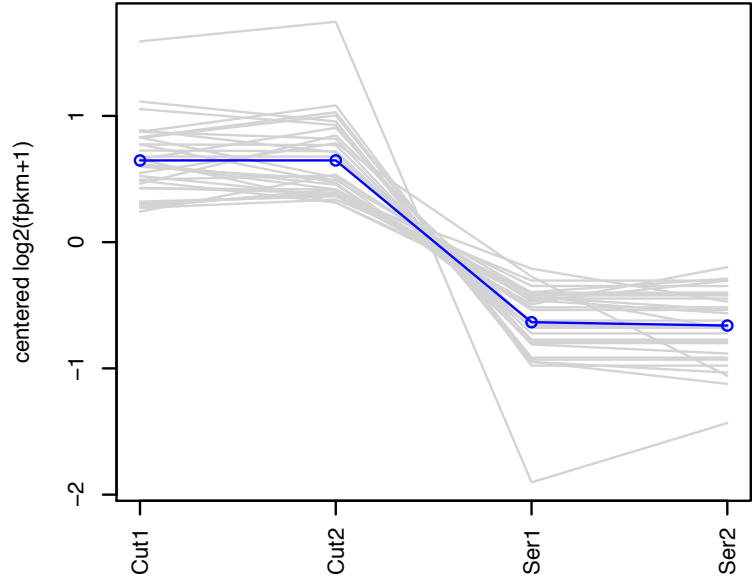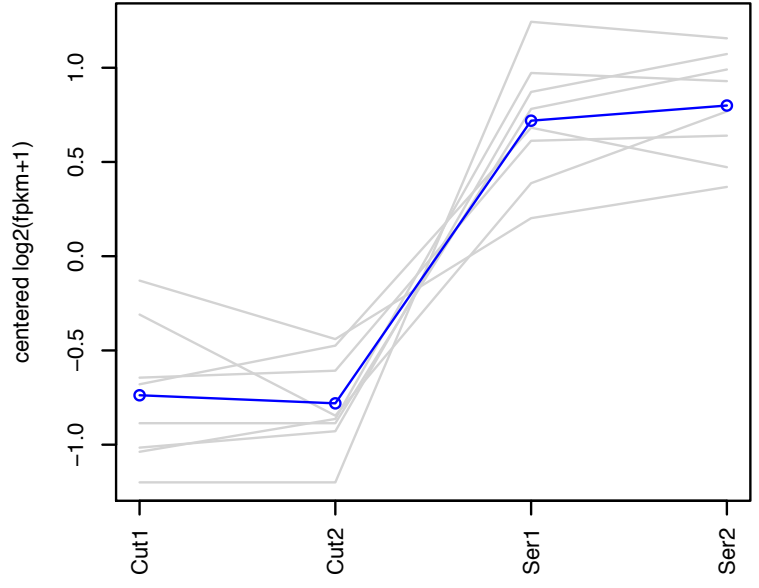

Supplement: 13071_2014_622_MOESM1_ESM.pdf [file 13071_2014_622_MOESM1_ESM.pdf]
