# Supplementary material for: Functional analysis of Girardia tigrina transcriptome seeds pipeline for anthelmintic target discovery
Source: PubMed Central journal article supplement (PMC4304616; doi:10.1186/s13071-014-0622-3), 2015-01-20
Supplement: 13071_2014_622_MOESM3_ESM.pdf [file 13071_2014_622_MOESM3_ESM.pdf]

Dtig\_m.24616  
Hsap\_NP\_690601.1  
Sman\_Smp\_010690  
Emul\_000305600.1..pep

```
1      10      20      30      40      50
..LLEVFNRGVKVELQKFTAAKAGNKIEKIKQCLADFDGAIYKINNEK.DKNIYLSITC
MILLEVNNRIIEETLALKFENAAAGNKPEAVEVTFADFDGVLVHISNPNNGDKTKVMVSTIS
MILFHEVCNRAVEEILVTRFEQAKEESRYDKIDYTVADFDISIVYTISSNPNNDKTKILVSTIF
MIFLEFHNSAVEDDLTRFESNAKAGKFKPEKIDYTVADFDRLVLRHINPEBGDKSKLLVSLL
```

Dtig\_m.24616  
Hsap\_NP\_690601.1  
Sman\_Smp\_010690  
Emul\_000305600.1..pep

```
60      70      80      90      100     110
LKFFKQLQEQYDADKVLKREYGDRLCSPPPEPCNVTIQFDLTKLFDIIEELAHNAALLKRN
LKFFKQLQEQYDADKVLKREYGDRLCSPPPEPCNVTIQFDLTKLFDIIEELAHNAALLKRN
LKFFKQLQEQYDADKVLKREYGDRLCSPPPEPCNVTIQFDLTKLFDIIEELAHNAALLKRN
VNFDELKQEQYDADKVLKREYGDRLCSPPPEPCNVTIQFDLTKLFDIIEELAHNAALLKRN
```

Dtig\_m.24616  
Hsap\_NP\_690601.1  
Sman\_Smp\_010690  
Emul\_000305600.1..pep

```
120     130     140     150     160     170
CFASVFEVTFEDYQESGNIAK...QTINVRDDETMVYKAMEDRVTVIFSTVFKDSDDIIL
CFASVFEVTFEDYQESGNIAK...QTINVRDDETMVYKAMEDRVTVIFSTVFKDSDDIIL
CFASVFEVTFEDYQESGNIAK...QTINVRDDETMVYKAMEDRVTVIFSTVFKDSDDIIL
CFASVFEVTFEDYQESGNIAK...QTINVRDDETMVYKAMEDRVTVIFSTVFKDSDDIIL
```

Dtig\_m.24616  
Hsap\_NP\_690601.1  
Sman\_Smp\_010690  
Emul\_000305600.1..pep

```
180     190     200     210     220     230
GKVFIOELTEARRRVDRAPOVLVSPKEPPELKGTKAAVGENVYITFVLFNRHFATPAA
GKVFIOELTEARRRVDRAPOVLVSPKEPPELKGTKAAVGENVYITFVLFNRHFATPAA
GKVFIOELTEARRRVDRAPOVLVSPKEPPELKGTKAAVGENVYITFVLFNRHFATPAA
GKVFIOELTEARRRVDRAPOVLVSPKEPPELKGTKAAVGENVYITFVLFNRHFATPAA
```

Dtig\_m.24616  
Hsap\_NP\_690601.1  
Sman\_Smp\_010690  
Emul\_000305600.1..pep

```
240     250     260     270     280
RKNSIDLIHTFRNVLHYHIKCSKAHIMRMRAKSGNFKLLKRAKP.....EI
RDNTINLIHTFRNVLHYHIKCSKAYIHTMRRAKSDFLKVLNRARP.....DA
RNSTIDLIHTFRNVLHYHIKCSKAYMQRMRRAKVEFLKVLNRAR.....I
DRSINLIHTFRNVLHYHIKCAKGYLQLRMRRAKSEFLKVLNRARVHQOQQOQQQLNDG
```

Dtig\_m.24616  
Hsap\_NP\_690601.1  
Sman\_Smp\_010690  
Emul\_000305600.1..pep

```
290     300     310     320
SASGSGCEAVDFRGVTD.....LGIEGLNLGSGDSLSQKKTFTGRVFLPQS.....
EKK.....EMKTITGKTFPSR.....
EHSNTNVTNITTVSSEVAPISPLMNKIGGIQSDN.....MGRIMRTG.....
EESAEPAVFVHALGLSSRSQIHRQPANRRGLASGNAFSSENMLMPSLSQSDFAQLKQF
```

Dtig\_m.24616  
Hsap\_NP\_690601.1  
Sman\_Smp\_010690  
Emul\_000305600.1..pep

```
.....
.....
.....
EDSEDEREEEDGVLSSAPLMANSIPSPCFDA
```

1            10            20            30            40            50  
 Sman\_Smp\_069770    ...MALRTFGSVSLKLLCRSDGSLPRNF...GRQSSHLFVHRERTRNNNSNTPFEFSA  
 Dtig\_m.6038        ...MFRNF...YQNIYRG.IOLKR...RCLSDKLFTHRDTPDNNANTLFEFNS  
 Emul\_001114700    ..MGLNIANQCFWSLRMLLSASKVSLNLTLPKAFRSFSTALFWHRDTAINNRDVLFEFIP  
 Hsap\_NP\_066552.2  MFFSAALRAARAAGLTAHWGRHVRNLHKTVMQ...NGAGGALFVHRDTPENNPDTFDFIP

60            70            80            90            100            110  
 Sman\_Smp\_069770    ENKRRLDVITISNYPPAHKAAAIIPALDLAQRQHGWLPIISAMNKVAEILNVPQMRVVEVAT  
 Dtig\_m.6038        ENLKRRETIKSNYPDGHQNAALIPVLDLAQRQHGWLPIISAMNKVAEILNMPMRVVEVAT  
 Emul\_001114700    ENLRRLEELKTHYPVGYHASLIMPALDLAQRQNGWLPIISAMSKIAEYLVGPEMRVVEVAT  
 Hsap\_NP\_066552.2  ENYKRLEAIVKNYPEGHKAAAVLPVLDLAQRQNGWLPIISAMNKVAEVLQVPMRVVVEVAT

120            130            140            150            160            170  
 Sman\_Smp\_069770    FYTMFNREPVGKYHIQVCTTTPCMLGGVGSSEVILNALKKNLGIEPQGTTPDKMFTLSEVE  
 Dtig\_m.6038        FYTMFNRPVGRYHVQVCTCSPCILGGVGSDDIILETIKKHLGIEPGETTSDKFLTSEVE  
 Emul\_001114700    FYTMFNRPVGRYHVQVCTTTPCMLGGVGSDDVILETIEKTLGIEPGETTDDKFLTISOVE  
 Hsap\_NP\_066552.2  FYTMVNRKPVGKYHIQVCTTTPCMLR..NSDSILEAIQRKLGIEPGETTDDKFLTIEVE

180            190            200            210            220            230  
 Sman\_Smp\_069770    CLGACVNAPMMQINDDYEDLTAEDTIRIIEIKAGKKPKPGPQSGGGRFASFPKGGELT  
 Dtig\_m.6038        CLGACVNAPMMAVNDYEDLTVDDTVRIINDFKANRRPKPGPQSGGGRFACFPKGGELT  
 Emul\_001114700    CLGACVNAPMMQINDDYEDLTPDDVVRILSDLKAGKKPKPGPQSGGGRHACAFKGGFT  
 Hsap\_NP\_066552.2  CLGACVNAPMVQINDNYEDLTAKDIEEILDELKAGKIIPKPGPRSG...RFSCFPAGGLT

240  
 Sman\_Smp\_069770    SLNTEPKSPGPKVRSDT.....  
 Dtig\_m.6038        SLTEEPKSPGPKVRSDT.....  
 Emul\_001114700    SLNTPVPVPDFKLQDAIKYTVDI  
 Hsap\_NP\_066552.2  SLTEEPKSPGPGVQAGL.....

1 10 20 30 40 50  
Emul\_000422600 .MEKPPNCFQSCTFMAFLVVRASFAFAARLG...CLPTFAGASRHVSTVSKDVTIIDH  
Sman\_Smp\_061230 .....NVHLLSLNLAIRKATKLNLYLTN.....IYQSFK...CRNLSYTSYVTVIIDH  
Dtig\_m.2I611 .....MSRLLCNLKRIVYEFSGKVGISR.....FPTRR...LSSQIISKVTVIVDH  
Hsap\_NP\_004159.2 MSGVVRGLSRLLSARRLALAKAWPTVLQGTGRGFHFTVDGNKRASAKVSDSISAQVFPVVDH

60 70 80 90 100 110  
Emul\_000422600 TYDAVVVGAGGAGLRAAFGLANEGFKTACVTKLFPTRSHTVAAOGGINAALGNMEODHNK  
Sman\_Smp\_061230 SEDAVVVGAGGAGLRAAFGLANEGFKTAITKLPTRSHTVAAOGGINAALGNMEPDDWR  
Dtig\_m.2I611 TYDAVVVGAGGAGLRAAFGLANSGFKTACITKLPTRSHTVAAOGGINAALGNMEKDDWR  
Hsap\_NP\_004159.2 ERDAVVVGAGGAGLRAAFGLSEAGFNACVTKLFPTRSHTVAAOGGINAALGNMEEDNWR

120 130 140 150 160 170  
Emul\_000422600 FEMFDIVKGSDWLGDQDAIHYMCEBAPKAVTELENYGMPFSRLENGKIYQRAFGGQSLHY  
Sman\_Smp\_061230 FEMFDIVKGSDWLGDQDAIHYMCEBAPKAVTELENYGVPFSRLENGKIYQRAFGGQSIDY  
Dtig\_m.2I611 YEMFDIVKGSDWLGDQDAIHYMCEBAPKAVTELENYGMPFSRLDNGMIYQRAFGGQAIY  
Hsap\_NP\_004159.2 WEFDIVKGSDWLGDQDAIHYMTEQAPAAVTELENYGMPFSRTEDEKIIYQRAFGGQSLKRF

180 190 200 210 220 230  
Emul\_000422600 GRGGQARRCCAVADRTGHSLLHTLYGRSLRYETDVFIEYFALDMLMENGVCRGINAMCCE  
Sman\_Smp\_061230 GRGGQARRCCAVADRTGHSLLHTLYGRSLRYDATVFIEYFVLDMLMENGVCRGVIAVCCLE  
Dtig\_m.2I611 GRGGQARRCCAVADRTGHSLLHTLYGRSLRYDVFIEYFAMDLMHGCRCGVIALNCE  
Hsap\_NP\_004159.2 GRGGQARRCCAVADRTGHSLLHTLYGRSLRYDTSYFVEYFALDMLMENGVCRGVIALCCE

240 250 260 270 280 290  
Emul\_000422600 DCTIHRERAKNTILATGGYGRAYFSC TSAHTCTGDGTAMVTRAGLPNEDEMFVQPHPTGI  
Sman\_Smp\_061230 DCTLHRERAKNTVILATGGYGRITYFSC TSAHTCTGDGTAMVTRAGLPNODMEFVQPHPTGI  
Dtig\_m.2I611 DCTLHRERAKNTVILATGGYGRITFFSCTSAHTCTGDGTAMISRAGLPNEDEMFVQPHPTGI  
Hsap\_NP\_004159.2 DCSIHRERAKNTVVILATGGYGRITYFSC TSAHTSCTGDGTAMITRAGLPCODEFVQPHPTGI

300 310 320 330 340 350  
Emul\_000422600 YGAGCLITEGCRGEGGV LINS EGERFMERYAPNAKDLASRDVVSRAMTIEIREGRGVGR  
Sman\_Smp\_061230 YGAGCLITEGCRGEGGV LINS KGERFMERYAPNAKDLASRDVVSRAMTIEIREGRGVGR  
Dtig\_m.2I611 YGAGCLITEGCRGEGGV LINS EGERFMERYAPNAKDLASRDVVSRAMTIEIREGRGVGR  
Hsap\_NP\_004159.2 YGAGCLITEGCRGEGGV LINS QGERFMERYAPNAKDLASRDVVSRAMTIEIREGRGVGR

360 370 380 390 400 410  
Emul\_000422600 KDHICYLKLHHLFPD LKSR LPGAIS E TAFAGVDVTKEPV PVLPTVHYNMGGV PPNYKGG  
Sman\_Smp\_061230 KDHIFLQLSHLPADQLHSR LPGAIS E TAFAGVDVTRDP PVLPTVHYNMGGI PPNYKGG  
Dtig\_m.2I611 KDHIFLQLSHLPBELKHLR LPGAIS E TAFAGVDVTRDP PVLPTVHYNMGGI PPNYKGG  
Hsap\_NP\_004159.2 KDHVYLQLHHLPEQLATRLPGAIS E TAFAGVDVTKEPV PVLPTVHYNMGGI PPNYKGG

420 430 440 450 460 470  
Emul\_000422600 VITYDAATGKDKIIPGLYAAGEVACASVHGANRLGANSLLDLVVPGRACALDTAEKCKPG  
Sman\_Smp\_061230 VLAYDPVAKKGVVPGLYAAGEAASASVHGANRLGANSLLDLVVPGRACALDTAAKKNKPG  
Dtig\_m.2I611 VIDYDPHTKDKKIVKGLYAAGEAACS VHGANRLGANSLLDLVVPGRACALDTAEENKPG  
Hsap\_NP\_004159.2 VLRH...VNGDQIVPGLYACGEAACAASVHGANRLGANSLLDLVVPGRACALSIEESCRPG

480 490 500 510 520 530  
Emul\_000422600 DFGPELHPETME SVANIDKLRSGKGFPPVSDVRL E MORTMOEHAAVFRDGPVKA GVEK  
Sman\_Smp\_061230 DAGPELKPDTCEASIANYEKLR TANGSYPIAQVRLDMORTMOEYAAVFRDGPVKEGCKR  
Dtig\_m.2I611 EKQPDLSKNAQEOSIANLDKVRHANGSLSTAEIRLKMOKTN OEHAAVFRDGPVQAGCKR  
Hsap\_NP\_004159.2 DKVPPIKPNAQESVMMNLDKRFADGSI RTSELRLSMOKSMONHAAVFRVSVLQEGCKR

540 550 560 570 580 590  
Emul\_000422600 MLKLYAAKYDN LKVS DKS L I WNSDL E GLELQNL L I N A V Q T I V A E A R K E S R G A H A R E D F  
Sman\_Smp\_061230 NYDLYASRMND LKVS DRSK I WNSDL E ALELQNLMLNALQ T I V G A E A R K E S R G A H A R E D F  
Dtig\_m.2I611 ILDLYRNDMQQLKLSDRSMTI WNSDL E ALELQNLMLNSLQ T I V G A E N R K E S R G A H S R E D F  
Hsap\_NP\_004159.2 ISKLYG.DLKH LKTFDRGMVWNTD L V E T L E L Q N L M L C A L Q T I Y G A E A R K E S R G A H A R E D Y

|                  |                    |                      |                   |        |     |     |
|------------------|--------------------|----------------------|-------------------|--------|-----|-----|
|                  | 600                | 610                  | 620               | 630    | 640 | 650 |
| Emul_000422600   | RQRIDEVDYSKPIEGG   | TKKPMSEHWRKHTMSYQNLK | TGAVKLEVRPVIDKTL  | DNVCP  | TV  |     |
| Sman_Smp_061230  | PNRVDEL DYSKPI DGG | KKPF EHWKHTLSYQDV    | TGAVKLEVRPVIDATL  | DAKSC  | PSV |     |
| Dtig_m.2I611     | KTRIDEVDYSKPIEGG   | VQKPF EHWKHTLSYQNL   | ISGAVKLVVRPVIDKTL | DSKCH  | TV  |     |
| Hsap_NP_004159.2 | KVRIDEVDYSKPIQGG   | QKPF EHWKHTLSYVDV    | GTGKVTLEVRPVIDKTL | NEADCA | TV  |     |

|                  |         |
|------------------|---------|
|                  | 660     |
| Emul_000422600   | PKIRSY  |
| Sman_Smp_061230  | PKLRTY  |
| Dtig_m.2I611     | PKQIRSY |
| Hsap_NP_004159.2 | PKAIRSY |
