# Supplementary material for: Functional analysis of Girardia tigrina transcriptome seeds pipeline for anthelmintic target discovery
Source: PubMed Central journal article supplement (PMC4304616; doi:10.1186/s13071-014-0622-3), 2015-01-20
Supplement: 13071_2014_622_MOESM4_ESM.pdf [file 13071_2014_622_MOESM4_ESM.pdf]

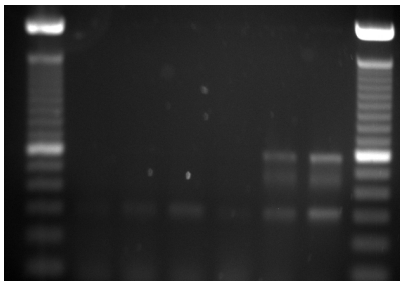

ARPC2 RNAi (4 RNAi + 2 controls)

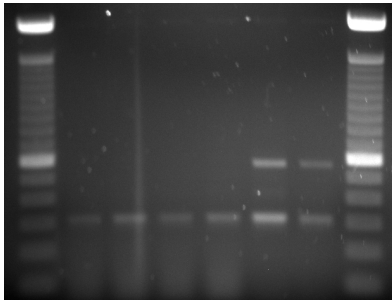

NDUFV2 RNAi (4 RNAi + 2 controls)
